# Supplementary material
Source: PubMed Central journal article supplement (PMC30110)

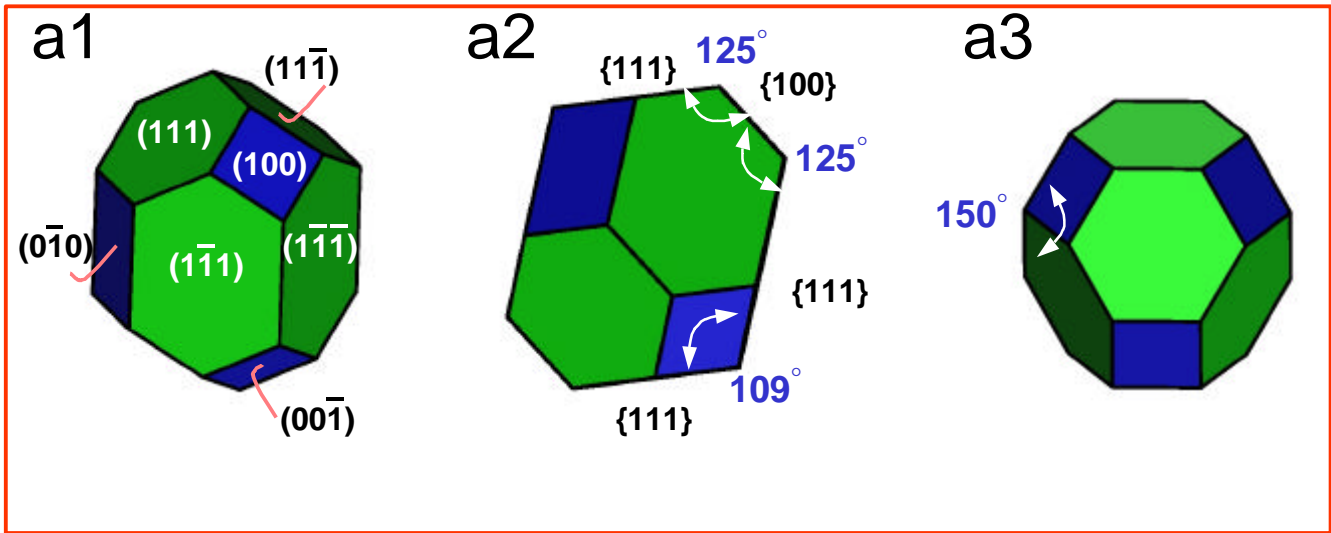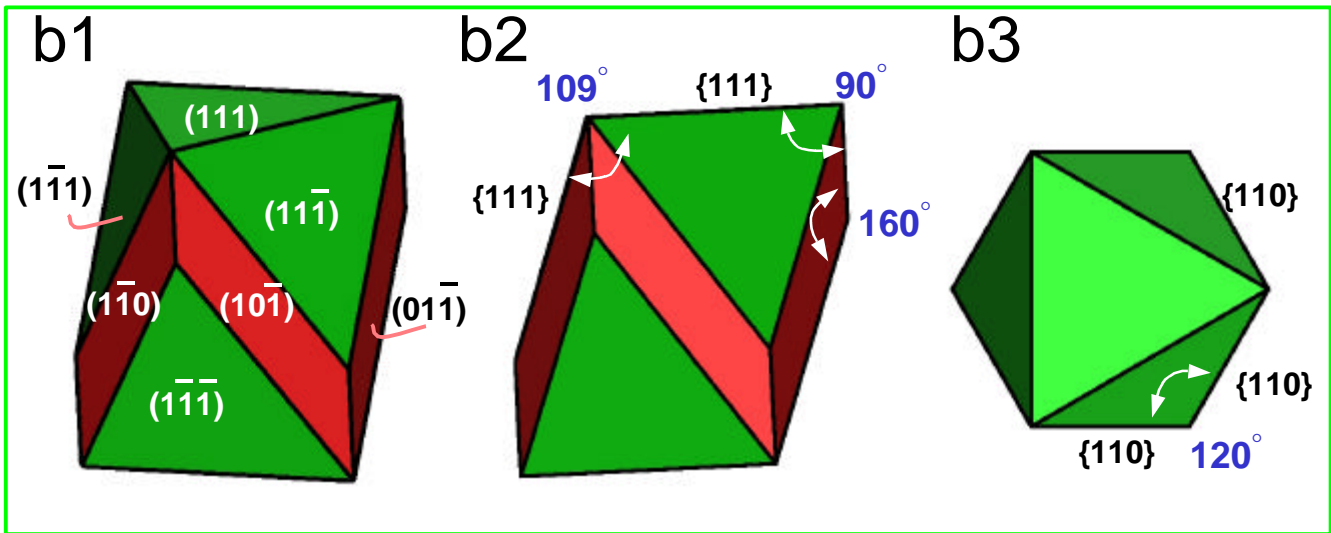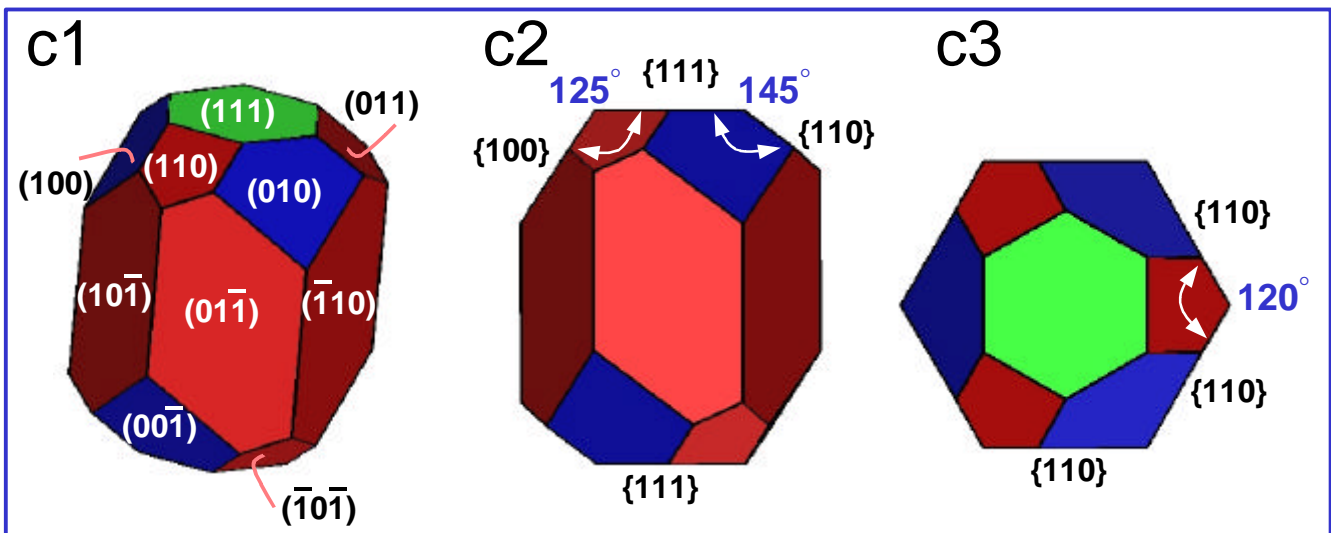

Supplement: pnas_98_5_2164__2.pdf [file pnas_98_5_2164__2.pdf]

a1

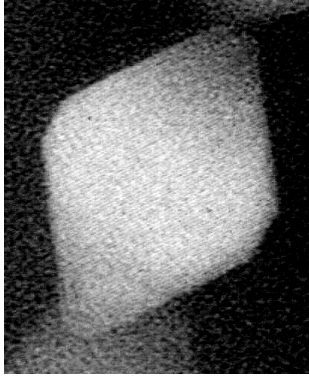

a2

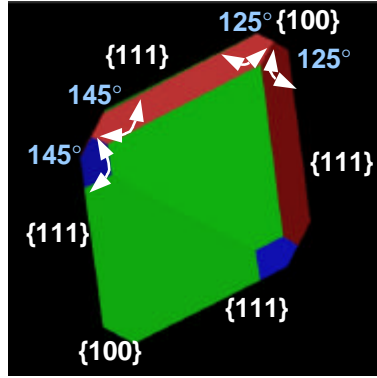

a3

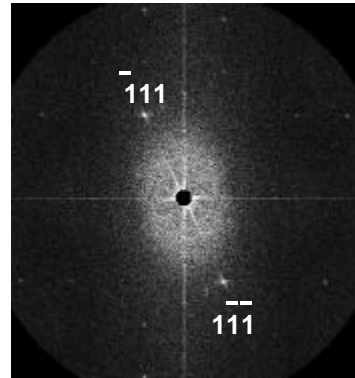

b1

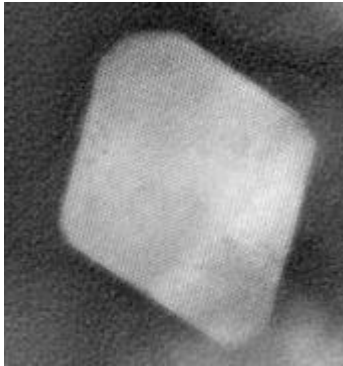

b2

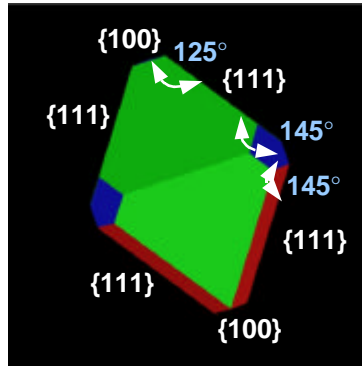

b3

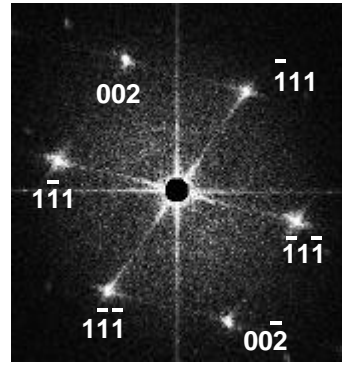

Supplement: pnas_98_5_2164__4.pdf [file pnas_98_5_2164__4.pdf]
